# Supplementary material
Source: publisher figshare collection journal article supplement (https://acs.figshare.com/ndownloader/files/16191302)
Supplement: Supplementary file 1 [file 16191302]

**Supporting Information**  
**For**  
**Lone-Pair Electron Driven Thermoelectrics at Room Temperature**

Saikat Mukhopadhyay<sup>1\*</sup>, Thomas L. Reinecke<sup>2\*</sup>

<sup>1</sup> NRC Research Associate at Naval Research Laboratory, Washington, DC 20375

<sup>2</sup> Naval Research Laboratory, Washington, DC 20375

\*Correspondence should be made to: SM:[saikatrel@gmail.com](mailto:saikatrel@gmail.com), TLR:[tom.reinecke@nrl.navy.mil](mailto:tom.reinecke@nrl.navy.mil)

*Stability:* The structures and the corresponding phase diagrams of  $Tl_3TaSe_4$ ,  $Tl_3VS_4$ ,  $In_3TaSe_4$  and  $In_3VS_4$  were predicted using Materials Project<sup>1</sup>. While  $Tl_3TaSe_4$  and  $Tl_3VS_4$  give stable ternary phase diagrams (as shown in Fig. S1),  $In_3TaSe_4$  and  $In_3VS_4$  are found to be thermodynamically unstable at 0K.

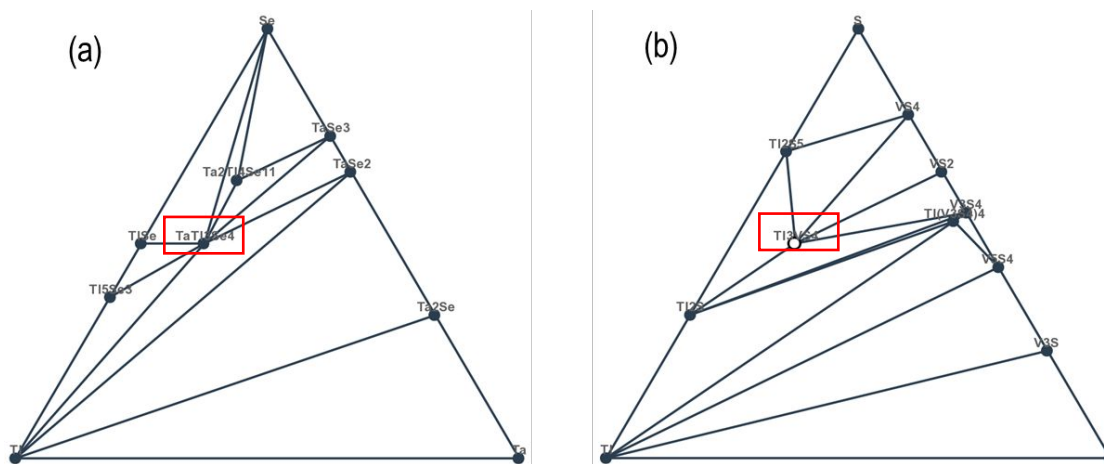

Figure S1: Phase diagrams for (a)  $Tl_3TaSe_4$  and (b)  $Tl_3VS_4$  from Materials Project<sup>1</sup>.

*Mean Square Displacement (MSD)*: Atomic displacement ( $u$ ) of the  $j^{\text{th}}$  atom in the  $l^{\text{th}}$  unit cell along Cartesian axis  $\alpha$  at a given time  $t$  can be written as<sup>2</sup>:

$$u^\alpha(jl, t) = \left(\frac{\hbar}{2Nm_j}\right)^{1/2} \sum_{\mathbf{q}, \nu} [\omega_\nu(\mathbf{q})^{-1/2} [\hat{a}_\nu(\mathbf{q})e^{-i\omega_\nu(\mathbf{q})t} + \hat{a}_\nu^\dagger(-\mathbf{q})e^{i\omega_\nu(\mathbf{q})t}] e^{i\mathbf{q}\cdot\mathbf{r}(jl)} e_\nu^\alpha(j, \mathbf{q})]$$

where  $m$  is the atomic mass,  $N$  is the number of unit cells,  $\mathbf{q}$  is the wave vector,  $\nu$  is the branch index,  $e_\nu^\alpha(j, \mathbf{q})$  is the polarization vector of the  $j^{\text{th}}$  atom in the  $l^{\text{th}}$  unit cell in mode  $\nu$ ,  $\mathbf{r}(jl)$  is the atomic position and  $\omega_\nu(\mathbf{q})$  is the phonon frequency.  $\hat{a}_\nu$  and  $\hat{a}_\nu^\dagger$  are phonon creation and annihilation operators. The expectation value of the squared atomic displacement is calculated as:

$$\langle |u^\alpha(jl, t)|^2 \rangle = \frac{\hbar}{2Nm_j} \sum_{\mathbf{q}, \nu} \omega_\nu(\mathbf{q})^{-1} (1 + 2n_\nu(\mathbf{q}, T)) |e_\nu^\alpha(j, \mathbf{q})|^2$$

where the phonon population  $n_\nu(\mathbf{q}, T)$  is:

$$n_\nu(\mathbf{q}, T) = \frac{1}{e^{\left(\frac{\hbar\omega_\nu(\mathbf{q})}{k_B T}\right)} - 1}$$

The mean square displacements (MSD) were projected along the (111) direction as implemented in Phonopy<sup>3</sup>:

$$MSD = \frac{\hbar}{2Nm_j} \sum_{\mathbf{q}, \nu} \omega_\nu(\mathbf{q})^{-1} (1 + 2n_\nu(\mathbf{q}, T)) |n \cdot e_\nu^\alpha(j, \mathbf{q})|^2$$

We projected the MSDs along (111)-direction (Fig. S2) using a  $31 \times 31 \times 31$  mesh-points, which were chosen based on rigorous convergence tests.

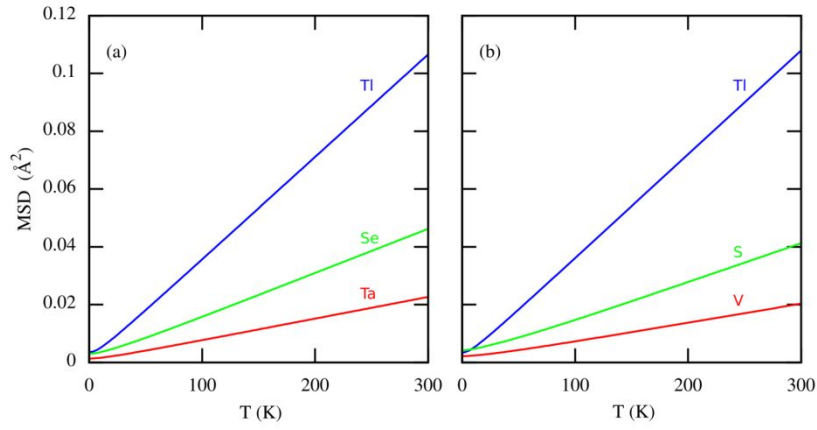

Figure S2: Mean square displacements of individual atoms for (a)  $Tl_3TaSe_4$  and (b)  $Tl_3VS_4$  at 300K.

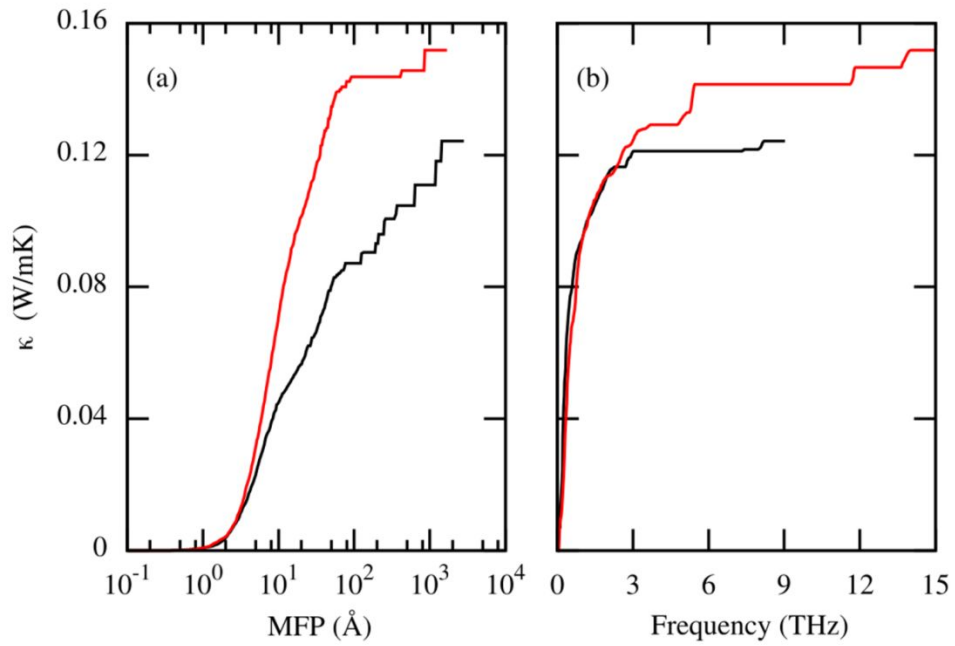

Figure S3: Accumulated  $\kappa$  for  $Tl_3TaSe_4$  (black) and  $Tl_3VS_4$  (red) at 300K as a function of (a) mean free path (MFP) and (b) phonon frequency.

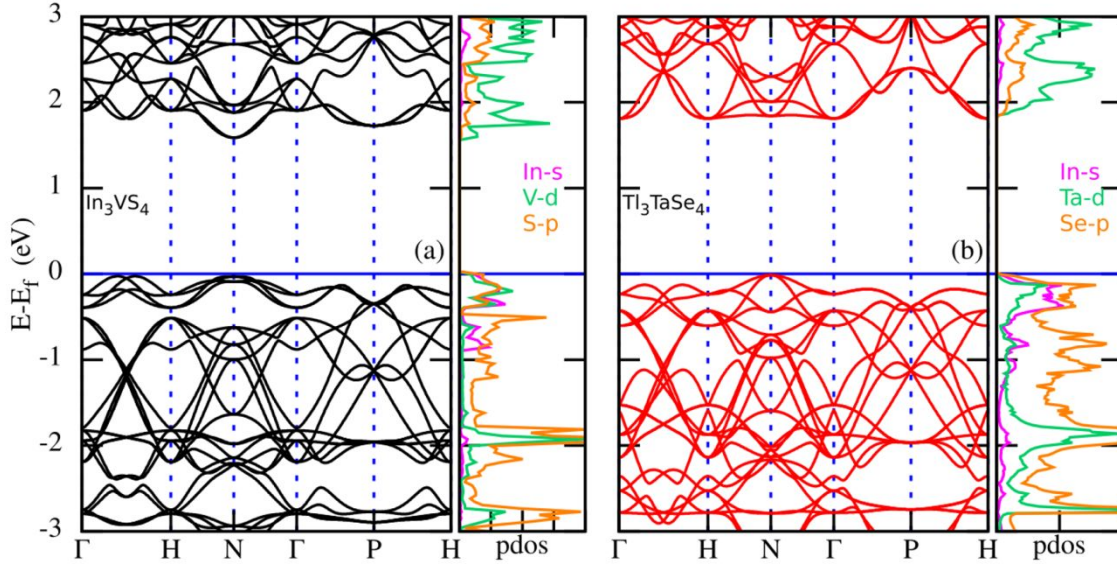

Figure S4: Electronic band structure and density of states projected on orbitals for (a)  $\text{In}_3\text{VS}_4$  and (b)  $\text{In}_3\text{TaSe}_4$ . The blue horizontal lines are the Fermi levels of the corresponding compounds.

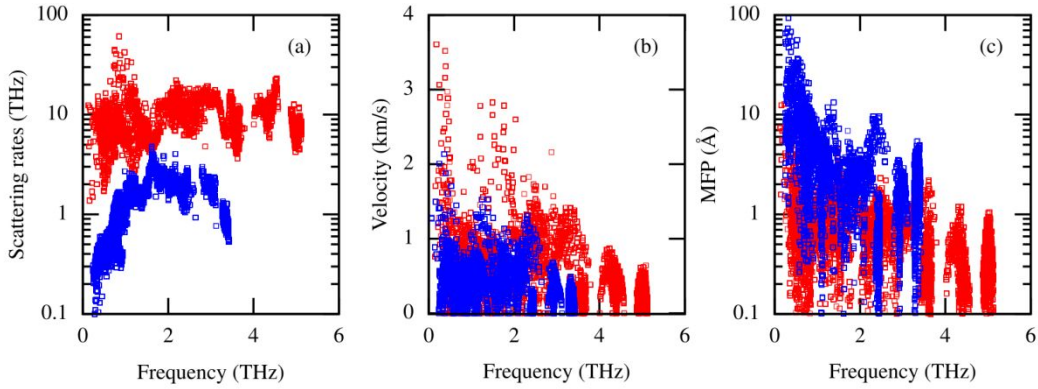

Figure S5: Comparison of lattice dynamical properties of  $\text{In}_3\text{VS}_4$  (red) and  $\text{Tl}_3\text{VSe}_4$  (blue): (a) scattering rates, (b) group velocity and (c) mean free path.

*Thermal conductivity:* Higher scattering rates in  $\text{In}_3\text{XY}_4$  than those in  $\text{Tl}_3\text{XY}_4$  (as shown in Fig. S4) give lower  $\kappa$  ( $<0.1$  W/mK)  $\text{In}_3\text{XY}_4$ . This was verified by calculating  $\kappa$  from almaBTE<sup>4</sup> and Phono3py<sup>5</sup> which give similar  $\kappa$ .

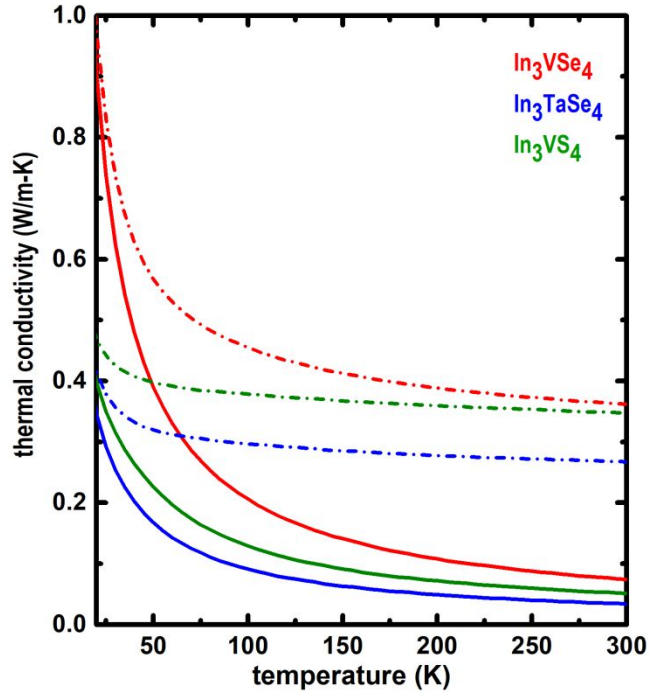

Figure S6: Thermal conductivity for  $\text{In}_3\text{VSe}_4$  (red),  $\text{In}_3\text{TaSe}_4$  (blue) and  $\text{In}_3\text{VS}_4$  (green). The solid lines are  $\kappa$ - contributions from the phonon Boltzmann equation<sup>4,5</sup> and the dashed are  $\kappa$  from the two channel model<sup>6</sup>.

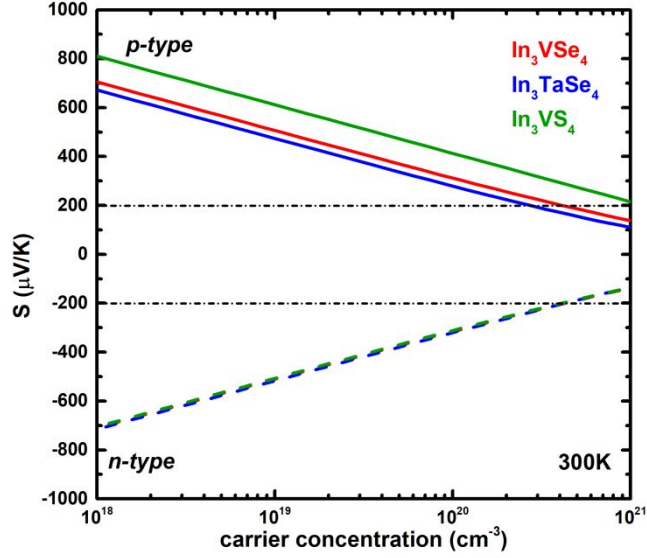

Figure S7: Calculated Seebeck coefficient of  $\text{In}_3\text{VSe}_4$ ,  $\text{In}_3\text{TaSe}_4$  and  $\text{In}_3\text{VS}_4$  as a function of carrier concentration at 300K.

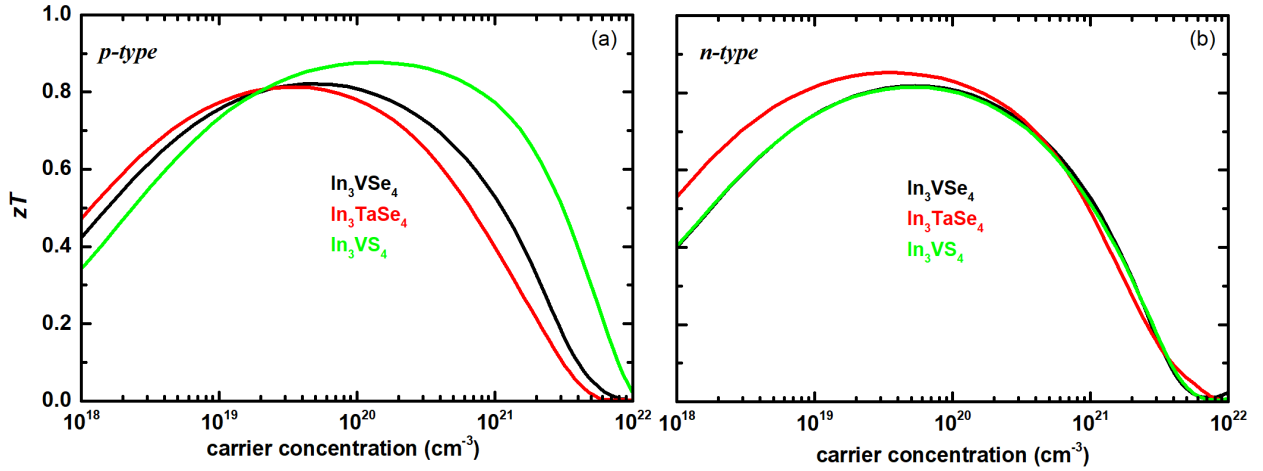

Figure S8: Thermoelectric properties of  $\text{In}_3\text{VSe}_4$ ,  $\text{In}_3\text{TaSe}_4$  and  $\text{In}_3\text{VS}_4$  as a function of carrier concentration at 300K when doped (a) p-type and (b) n-type. A relaxation time;  $\tau = 9 \times 10^{-14}\text{s}$  was used for all the cases to be consistent with  $\text{Tl}_3\text{XY}_4$  discussed in the main text.

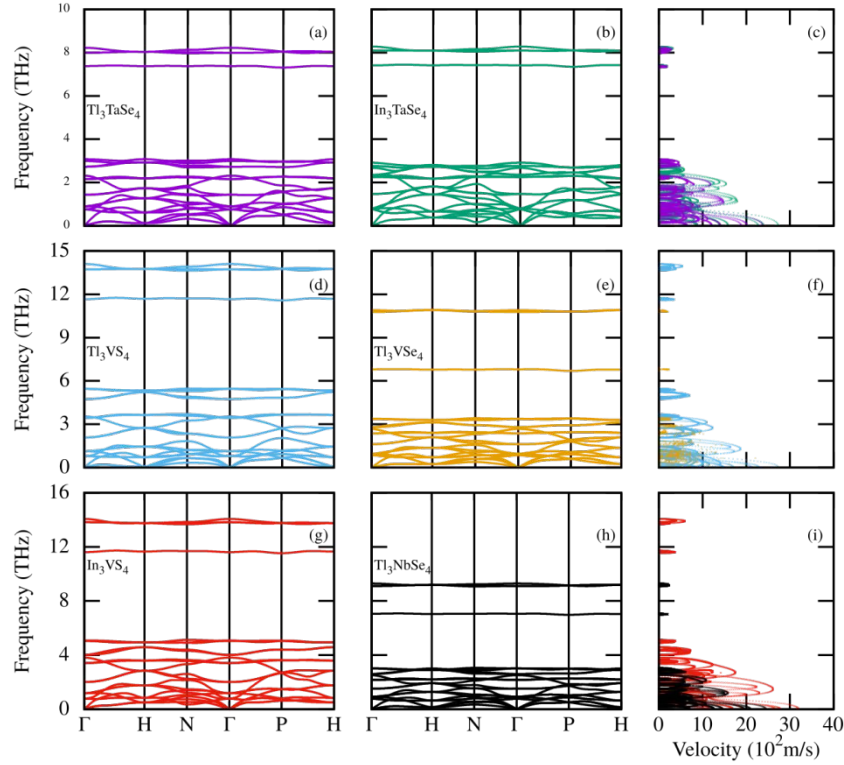

Figure S9: Comparative lattice dynamical properties in  $Z_3XY_4$  ( $X=In/Tl$ ,  $X=Ta/V/Nb$  and  $Y= S/Se$ ) as a result of variation of  $Z$  (a-c),  $Y$  (d-f) and  $X, Y, Z$  (g-i) atoms

## References

- (1) Jain, A.; Ong, S. P.; Hautier, G.; Chen, W.; Richards, W. D.; Dacek, S.; Cholia, S.; Gunter, D.; Skinner, D.; Ceder, G.; Persson, K. A., Commentary: The Materials Project: A Materials Genome Approach to Accelerating Materials Innovation, *APL Materials*. **2013**, *1*, 011002 (1-11) .
- (2) Wallace, D. C. *Thermodynamics of Crystal*. (Dover Publications, 1998).
- (3) Togo, A.; Tanaka, I., First Principles Phonon Calculations in Materials Science, *Scr. Mater.* **2015**, *108*, (1-5).
- (4) Carrete, J.; Vermeersch, B.; Katre, A.; van Roekeghem, A.; Wang, T.; Madsen, G. K. H.;

Mingo, N., almaBTE : A Solver of the Space–Time Dependent Boltzmann Transport Equation for Phonons in Structured Materials, *Comput. Phys. Commun.* **2017**, *220*, (351-362)

(5) Togo, A., Chaput, L. & Tanaka, I. Distributions of Phonon Lifetimes in Brillouin Zones. *Phys. Rev. B.* **2015**, *91*, 094306 (1-31).

(6) Mukhopadhyay, S.; Parker, D. S.; Sales, B. C.; Poretzky, A. A.; McGuire, M. A.; Lindsay, L., Two-Channel Model for Ultralow Thermal Conductivity of Crystalline  $\text{Ti}_3\text{VSe}_4$ , *Science.* **2018**, *360*, (1455-1458).
